# Supplementary material
Source: MDPI journal article supplement (https://www.mdpi.com/2077-1312/8/10/812)
Supplement: s1 [file s1]

## Sheet: Φύλλο1
No	X	Y	a-axis Length (cm)	b-axis Width (cm)	c-axis Height (cm)	Volume (m3)	75% Volume (m3) by Majid et al. 2016	Mass (Μg)	Tsunami wave Height Ht(m), Pignatelli et al. 2009 (JBB)	Storm wave Height Hs(m), Pignatelli et al. 2009 (JBB)	Tsunami wave Height Ht(m), Barbano et al. 2010 (SMB)	Storm wave Height Hs(m), Barbano et al. 2010 (SMB)	Tsunami wave Height Ht(m), Benner et al. 2010 (SMB)	Storm wave Height Hs(m), Benner et al. 2010 (SMB)	Wave Velocity ((m/s)^2) , Nandasena et al. 2011 (SAB)	Tsunami wave Height Ht(m), Nandasena et al. 2011 (SAB)	Storm wave Height Hs(m) , Nandasena et al. 2011 (SAB)	Wave Velocity ((m/s)^2) , Nandasena et al. 2011 (SMB-rolling)	Tsunami wave Height Ht(m), Nandasena et al. 2011 (SMB)	Storm wave Height Hs(m), Nandasena et al. 2011 (SMB)	Wave Velocity ((m/s)^2) , Nandasena et al. 2011 (JBB-rolling)	Tsunami wave Height Ht(m), Nandasena et al. 2011 (JBB)	Storm wave Height Hs(m), Nandasena et al. 2011 (JBB)	Tsunami wave Height Ht(m), Engel and May 2012 (SMB)	Storm wave Height Hs(m), Engel and May 2012 (SMB)
1	598574	3868957	200	190	75	2.85	2.1375	5.53	1.96216	7.84865	0.95694	3.82776	7.97244	31.8897	26.6368	0.678819	2.71527	31.9211	0.813483	3.25393	59.9496	1.52777	6.11107	2.86487	11.4595
2	598597	3868940	285	190	58	3.14	2.355	6.09	1.5174	6.06962	0.931942	3.72777	8.1167	32.4668	27.7542	0.707293	2.82917	32.0034	0.81558	3.26232	46.361	1.18147	4.72589	3.47833	13.9133
3	598601	3868941	410	370	98	14.87	11.1525	28.84	2.56389	10.2556	1.74066	6.96263	15.4574	61.8298	53.726	1.36916	5.47666	60.5477	1.54301	6.17203	78.3341	1.99628	7.98513	40.0395	160.158
4	598600	3868940	150	90	58	0.78	0.585	1.52	1.5174	6.06962	0.399335	1.59734	2.90535	11.6214	9.88393	0.251884	1.00754	12.2252	0.311549	1.24619	46.361	1.18147	4.72589	0.45476	1.81904
5	598603	3868942	96	76	52	0.38	0.285	0.74	1.36043	5.44173	0.327339	1.30936	2.32652	9.30609	8.00336	0.203959	0.815837	9.8781	0.251736	1.00694	41.565	1.05925	4.23701	0.127124	0.508495
6	598599	3868943	130	76	27	0.27	0.2025	0.52	0.706378	2.82551	0.381647	1.52659	3.24326	12.973	10.9226	0.278354	1.11342	12.8963	0.328652	1.31461	21.5818	0.549996	2.19998	0.0635095	0.254038
7	598601	3868964	230	210	80	3.86	2.895	7.5	2.09297	8.37189	1.05793	4.23171	8.87543	35.5017	29.7244	0.757503	3.03001	35.45	0.903415	3.61366	63.9462	1.62962	6.51847	4.75963	19.0385
8	598601	3868969	331	310	120	12.31	9.2325	23.89	3.13946	12.5578	1.56178	6.24711	13.0619	52.2475	43.6965	1.11357	4.45428	52.228	1.33099	5.32395	95.9193	2.44443	9.7777	32.7669	131.068
9	598606	3868973	176	81	42	0.6	0.45	1.16	1.09881	4.39524	0.390681	1.56273	3.05039	12.2015	10.1518	0.258711	1.03485	12.5008	0.318573	1.27429	33.5717	0.855549	3.4222	0.297222	1.18889
10	598605	3868971	180	107	110	2.12	1.59	4.11	2.87784	11.5113	0.354199	1.4168	2.00256	8.01025	8.06051	0.205416	0.821663	9.3506	0.238292	0.95317	87.926	2.24072	8.9629	2.813	11.252
11	598607	3868969	246	222	91	4.97	3.7275	9.64	2.38076	9.52302	1.11628	4.46512	9.22831	36.9132	30.7672	0.784077	3.13631	37.0501	0.944193	3.77677	72.7388	1.85369	7.41476	7.45592	29.8237
12	598610	3868963	239	198	60	2.84	2.13	5.51	1.56973	6.27892	0.969531	3.87812	8.45322	33.8129	28.9284	0.737217	2.94887	33.318	0.849082	3.39633	47.9596	1.22221	4.88885	2.7292	10.9168
13	598610	3868965	260	152	50	1.98	1.485	3.83	1.30811	5.23243	0.756358	3.02543	6.51172	26.0469	22.0905	0.562959	2.25183	25.7769	0.656904	2.62762	39.9664	1.01851	4.07404	1.72495	6.8998
14	598609	3868965	115	76	26	0.23	0.1725	0.44	0.680216	2.72086	0.38022	1.52088	3.25228	13.0091	10.9908	0.280091	1.12036	12.903	0.328823	1.31529	20.7825	0.529626	2.1185	0.0460858	0.184343
15	598610	3868965	230	148	70	2.38	1.785	4.62	1.83135	7.3254	0.730171	2.92068	5.84167	23.3667	19.4034	0.49448	1.97792	23.729	0.604714	2.41886	55.9529	1.42592	5.70366	2.56786	10.2714
16	598610	3868965	90	66	52	0.31	0.2325	0.6	1.36043	5.44173	0.262386	1.04954	1.74987	6.9995	6.24466	0.15914	0.636561	7.61914	0.194168	0.776671	41.565	1.05925	4.23701	0.0972245	0.388898
17	598610	3868964	120	70	41	0.34	0.255	0.67	1.07265	4.29059	0.323792	1.29517	2.43614	9.74455	8.18084	0.208482	0.833929	10.1214	0.257937	1.03175	32.7724	0.835179	3.34072	0.112102	0.448407
18	598611	3868964	175	110	33	0.64	0.48	1.23	0.863351	3.4534	0.53733	2.14932	4.6918	18.7672	16.0742	0.409637	1.63855	18.4833	0.471031	1.88413	26.3778	0.672217	2.68887	0.247685	0.990741
19	598610	3868963	260	196	117	5.96	4.47	11.57	3.06097	12.2439	0.899687	3.59875	6.72635	26.9054	22.6362	0.576865	2.30746	28.0125	0.713875	2.8555	93.5213	2.38332	9.53326	12.1499	48.5997
20	598612	3868965	130	135	100	1.76	1.32	3.4	2.61622	10.4649	0.55675	2.227	3.82397	15.2959	13.4033	0.341571	1.36628	16.4552	0.419348	1.67739	79.9327	2.03702	8.14809	1.53329	6.13316
21	598613	3868966	248	159	64	2.52	1.89	4.9	1.67438	6.69751	0.800271	3.20109	6.64088	26.5635	22.1623	0.564789	2.25916	26.6266	0.678558	2.71423	51.157	1.30369	5.21478	2.6804	10.7216
22	598613	3868967	228	239	60	3.27	2.4525	6.34	1.56973	6.27892	1.10166	4.40662	9.84732	39.3893	34.444	0.877778	3.51111	38.4877	0.980827	3.92331	47.9596	1.22221	4.88885	2.9978	11.9912
23	598610	3868970	310	230	86	6.13	4.5975	11.9	2.24994	8.99978	1.15825	4.63298	9.75151	39.006	32.7035	0.833422	3.33369	38.9011	0.991364	3.96545	68.7422	1.75184	7.00736	10.9519	43.8075
24	598610	3868970	188	110	35	0.72	0.54	1.4	0.915675	3.6627	0.54423	2.17692	4.71022	18.8409	16.0341	0.408617	1.63447	18.6119	0.474309	1.89724	27.9765	0.712958	2.85183	0.317487	1.26995
25	598607	3868970	179	95	72	1.22	0.915	2.38	1.88367	7.5347	0.386602	1.54641	2.62729	10.5092	9.26704	0.236163	0.944652	11.3535	0.289334	1.15734	57.5516	1.46666	5.86662	1.05369	4.21477
26	598618	3868973	163	81	40	0.53	0.3975	1.02	1.04649	4.18594	0.395791	1.58316	3.1316	12.5264	10.4064	0.265199	1.06079	12.7717	0.325476	1.3019	31.9731	0.814809	3.25923	0.231575	0.9263
27	598618	3868973	122	51	45	0.28	0.21	0.54	1.1773	4.70919	0.188409	0.753635	1.18126	4.72505	4.39572	0.112021	0.448085	5.27543	0.13444	0.53776	35.9697	0.91666	3.66664	0.103015	0.412058
28	598618	3868973	69	25	22	0.04	0.03	0.07	0.575567	2.30227	0.0925249	0.3701	0.581022	2.32409	2.15965	0.055037	0.220148	2.59308	0.0660826	0.26433	17.5852	0.448145	1.79258	0.00406911	0.0162765
29	598618	3868976	134	77	77	0.79	0.5925	1.54	2.01449	8.05794	0.260217	1.04087	1.50205	6.0082	5.94768	0.151572	0.606287	6.94968	0.177107	0.708428	61.5482	1.56851	6.27403	0.546249	2.185
30	598618	3868977	257	235	62	3.74	2.805	7.26	1.62205	6.48821	1.104	4.41599	9.80858	39.2343	34.1078	0.869211	3.47684	38.4144	0.97896	3.91584	49.5583	1.26295	5.05181	3.9936	15.9744
31	598619	3868978	109	77	22	0.18	0.135	0.36	0.575567	2.30227	0.371254	1.48502	3.2641	13.0564	11.2451	0.286572	1.14629	12.8288	0.326932	1.30773	17.5852	0.448145	1.79258	0.0289261	0.115704
32	598633	3868975	182	172	72	2.25	1.6875	4.37	1.88367	7.5347	0.863546	3.45418	7.10722	28.4289	23.6718	0.603258	2.41303	28.5792	0.728319	2.91328	57.5516	1.46666	5.86662	1.97585	7.90341
33	598632	3868975	247	103	90	2.29	1.7175	4.44	2.35459	9.41837	0.383035	1.53214	2.41538	9.66151	8.95132	0.228117	0.912469	10.761	0.274235	1.09694	71.9395	1.83332	7.33328	3.41148	13.6459
34	598632	3868974	200	146	92	2.69	2.0175	5.21	2.40692	9.62767	0.654606	2.61842	4.80217	19.2087	16.2788	0.414853	1.65941	20.1429	0.513326	2.05331	73.5381	1.87406	7.49624	3.31694	13.2678
35	598632	3868974	99	54	78	0.42	0.315	0.81	2.04065	8.16259	0.135449	0.541798	0.527349	2.1094	2.92803	0.0746186	0.298474	2.95606	0.0753329	0.301331	62.3475	1.58888	6.35551	0.217344	0.869375
36	598635	3868978	251	244	92	5.63	4.2225	10.93	2.40692	9.62767	1.22901	4.91603	10.331	41.3239	34.6251	0.882393	3.52957	41.2354	1.05085	4.20341	73.5381	1.87406	7.49624	8.71241	34.8496
37	598639	3868976	186	185	119	4.09	3.0675	7.94	3.1133	12.4532	0.821579	3.28632	5.98156	23.9262	20.3428	0.51842	2.07368	25.1625	0.641247	2.56499	95.12	2.42406	9.69622	6.06668	24.2667
38	598637	3868974	90	55	49	0.24	0.18	0.47	1.28195	5.12778	0.201852	0.807408	1.25825	5.03299	4.70167	0.119818	0.479274	5.63286	0.143549	0.574196	39.167	0.998141	3.99256	0.070928	0.283712
39	598634	3868973	253	167	66	2.79	2.0925	5.41	1.7267	6.90681	0.841075	3.3643	7.00546	28.0218	23.4043	0.596441	2.38576	28.0517	0.714876	2.8595	52.7556	1.34443	5.37774	3.12203	12.4881
40	598639	3868972	243	176	102	4.36	3.27	8.46	2.66854	10.6742	0.817489	3.26996	6.17193	24.6877	20.7033	0.527606	2.11042	25.6094	0.652635	2.61054	81.5314	2.07776	8.31105	7.24204	28.9682
41	598636	3868965	513	310	162	25.76	19.32	49.98	4.23827	16.9531	1.49179	5.96717	11.6221	46.4883	38.6923	0.986042	3.94417	47.6669	1.21475	4.85901	129.491	3.29998	13.1999	143.465	573.861
42	598630	3868967	240	131	80	2.52	1.89	4.88	2.09297	8.37189	0.595577	2.38231	4.41811	17.6724	14.9106	0.379985	1.51994	18.4538	0.47028	1.88112	63.9462	1.62962	6.51847	3.24242	12.9697
43	598632	3868961	116	46	24	0.13	0.0975	0.25	0.627892	2.51157	0.221468	0.885872	1.72618	6.9047	5.74637	0.146442	0.585766	7.07857	0.180392	0.721567	19.1839	0.488885	1.95554	0.0242539	0.0970154
44	598627	3868962	279	205	74	4.23	3.1725	8.21	1.936	7.744	1.03064	4.12255	8.73352	34.9341	29.3724	0.748531	2.99413	34.7617	0.885874	3.5435	59.1502	1.5074	6.02958	5.85254	23.4102
45	598625	3868964	222	112	70	1.74	1.305	3.38	1.83135	7.3254	0.504028	2.01611	3.70849	14.8339	12.5561	0.319981	1.27992	15.5379	0.395972	1.58389	55.9529	1.42592	5.70366	1.81204	7.24817
46	598639	3868958	140	76	31	0.33	0.2475	0.64	0.811027	3.24411	0.382262	1.52905	3.16343	12.6537	10.5496	0.268847	1.07539	12.696	0.323548	1.29419	24.7791	0.631477	2.52591	0.095978	0.383912
47	598639	3868958	152	79	31	0.37	0.2775	0.72	0.811027	3.24411	0.397937	1.59175	3.3192	13.2768	11.094	0.282721	1.13088	13.2843	0.338541	1.35416	24.7791	0.631477	2.52591	0.116836	0.467342
48	598639	3868958	97	88	23	0.2	0.15	0.38	0.601729	2.40692	0.411996	1.64798	3.66472	14.6589	12.7576	0.325118	1.30047	14.3469	0.365618	1.46247	18.3845	0.468515	1.87406	0.0299018	0.119607
49	598642	3868963	278	277	69	5.31	3.9825	10.31	1.80519	7.22075	1.27277	5.09109	11.3874	45.5494	39.8674	1.01599	4.06395	44.4931	1.13387	4.53548	55.1536	1.40555	5.62218	6.82585	27.3034
50	598619	3868920	170	208	73	2.58	1.935	5.01	1.90984	7.63935	1.04341	4.17363	8.8859	35.5436	29.9582	0.763461	3.05385	35.3072	0.899776	3.5991	58.3509	1.48703	5.9481	2.14565	8.58261
51	598632	3868938	262	177	73	3.39	2.5425	6.57	1.90984	7.63935	0.88965	3.5586	7.34529	29.3811	24.4817	0.623897	2.49559	29.5035	0.751873	3.00749	58.3509	1.48703	5.9481	4.34502	17.3801
52	598632	3868934	115	95	27	0.29	0.2175	0.57	0.706378	2.82551	0.457334	1.82934	4.02383	16.0953	13.8709	0.353488	1.41395	15.8109	0.402928	1.61171	21.5818	0.549996	2.19998	0.0603431	0.241372
53	598636	3868930	549	441	112	27.12	20.34	52.61	2.93016	11.7206	2.04216	8.16866	18.229	72.9159	63.6743	1.62269	6.49076	71.2799	1.81651	7.26605	89.5247	2.28146	9.12586	111.75	447.001
54	598642	3868948	362	317	118	13.54	10.155	26.27	3.08713	12.3485	1.59614	6.38455	13.4495	53.798	45.1209	1.14987	4.59948	53.6376	1.36691	5.46764	94.3206	2.40369	9.61474	38.7594	155.038
55	598656	3868942	221	137	52	1.57	1.1775	3.05	1.36043	5.44173	0.69014	2.76056	5.79395	23.1758	19.4094	0.494634	1.97854	23.1364	0.589612	2.35845	41.565	1.05925	4.23701	1.2091	4.83641
56	598666	3868956	280	207	52	3.01	2.2575	5.85	1.36043	5.44173	0.954402	3.81761	8.53041	34.1217	29.8355	0.760333	3.04133	33.3415	0.849681	3.39872	41.565	1.05925	4.23701	2.93695	11.7478
57	598666	3868956	177	109	187	3.61	2.7075	7	4.89232	19.5693	0.234731	0.938923	0.644801	2.5792	4.94196	0.125942	0.503767	4.42348	0.112729	0.450915	149.474	3.80923	15.2369	8.00738	32.0295
58	598666	3868956	179	194	105	3.65	2.7375	7.07	2.74703	10.9881	0.923413	3.69365	7.12119	28.4848	23.7537	0.605344	2.42138	29.3164	0.747104	2.98842	83.9294	2.13887	8.55549	4.59731	18.3892
59	598687	3868956	160	159	34	0.86	0.645	1.68	0.889513	3.55805	0.679918	2.71967	6.18451	24.738	22.0354	0.561555	2.24622	24.0317	0.612429	2.44972	27.1771	0.692587	2.77035	0.31352	1.25408
60	598688	3868954	182	152	79	2.19	1.6425	4.24	2.06681	8.26724	0.732632	2.93053	5.71651	22.8661	19.0268	0.484882	1.93953	23.4325	0.597159	2.38864	63.1469	1.60925	6.43699	2.11014	8.44055
61	598685	3868950	204	150	59	1.81	1.3575	3.5	1.54357	6.17427	0.755541	3.02216	6.29902	25.1961	21.0505	0.536454	2.14582	25.2146	0.642573	2.57029	47.1603	1.20184	4.80737	1.45992	5.83968
62	598673	3868947	226	200	79	3.57	2.6775	6.93	2.06681	8.26724	1.00729	4.02916	8.39078	33.5631	28.0334	0.714409	2.85764	33.5977	0.85621	3.42484	63.1469	1.60925	6.43699	4.27142	17.0857
63	598659	3868930	219	159	81	2.82	2.115	5.47	2.11913	8.47654	0.770708	3.08283	6.04718	24.1887	20.1117	0.512532	2.05013	24.7376	0.630418	2.52167	64.7455	1.64999	6.59995	3.35233	13.4093
64	598654	3868922	261	149	116	4.51	3.3825	8.75	3.03481	12.1392	0.596692	2.38677	4.00299	16.012	14.232	0.362692	1.45077	17.388	0.44312	1.77248	92.722	2.36295	9.45178	9.15047	36.6019
65	598651	3868918	257	200	110	5.65	4.2375	10.97	2.87784	11.5113	0.946867	3.78747	7.26698	29.0679	24.2665	0.618413	2.47365	29.9698	0.763756	3.05502	87.926	2.24072	8.9629	10.7039	42.8156
66	598667	3868930	256	166	53	2.25	1.6875	4.37	1.38659	5.54638	0.821821	3.28728	7.10891	28.4356	24.1908	0.616483	2.46593	28.0952	0.715984	2.86394	42.3644	1.07962	4.31849	2.04582	8.18326
67	598683	3868939	326	254	78	6.46	4.845	12.53	2.04065	8.16259	1.24753	4.99014	10.8557	43.4228	37.0957	0.945353	3.78141	42.816	1.09113	4.36452	62.3475	1.58888	6.35551	11.0081	44.0325
68	598698	3868952	187	149	47	1.31	0.9825	2.54	1.22962	4.91848	0.735953	2.94381	6.37809	25.5124	21.7317	0.553816	2.21526	25.1908	0.641966	2.56786	37.5684	0.9574	3.8296	0.771576	3.08631
69	598682	3868933	183	134	62	1.52	1.14	2.95	1.62205	6.48821	0.663898	2.65559	5.34033	21.3613	17.7395	0.452077	1.80831	21.6503	0.55174	2.20696	49.5583	1.26295	5.05181	1.15573	4.6229
70	598656	3868906	278	151	87	3.65	2.7375	7.09	2.27611	9.10443	0.702952	2.81181	5.31725	21.269	17.8259	0.45428	1.81712	22.0475	0.561862	2.24745	69.5415	1.77221	7.08884	5.91596	23.6638
71	598656	3868906	242	209	87	4.4	3.3	8.54	2.27611	9.10443	1.04978	4.19912	8.65035	34.6014	28.8188	0.734424	2.93769	34.7697	0.886077	3.54431	69.5415	1.77221	7.08884	6.20805	24.8322
72	598672	3868908	518	332	123	21.15	15.8625	41.04	3.21794	12.8718	1.67138	6.6855	14.0959	56.3836	47.3069	1.20558	4.82231	56.1982	1.43217	5.72867	98.3173	2.50554	10.0221	90.3053	361.221
73	598676	3868911	345	254	121	10.6	7.95	20.57	3.16562	12.6625	1.25128	5.00512	9.99275	39.971	33.192	0.845872	3.38349	40.6171	1.03509	4.14038	96.7186	2.4648	9.85919	29.6537	118.615
74	598678	3868925	229	190	53	2.31	1.7325	4.47	1.38659	5.54638	0.909497	3.63799	8.02239	32.0896	27.7147	0.706287	2.82515	31.4955	0.802639	3.21056	42.3644	1.07962	4.31849	1.87885	7.51539
75	598678	3868925	416	250	117	12.17	9.1275	23.61	3.06097	12.2439	1.23597	4.9439	9.91429	39.6572	32.9312	0.839225	3.3569	40.234	1.02533	4.10133	93.5213	2.38332	9.53326	39.6952	158.781
76	598697	3868939	142	67	107	1.02	0.765	1.97	2.79935	11.1974	0.15386	0.615442	0.499786	1.99914	3.27573	0.0834793	0.333917	3.09994	0.0789996	0.315998	85.528	2.17961	8.71845	1.03858	4.15432
77	598696	3868941	239	158	59	2.23	1.6725	4.32	1.54357	6.17427	0.795632	3.18253	6.70026	26.801	22.4728	0.572702	2.29081	26.7266	0.681107	2.72443	47.1603	1.20184	4.80737	2.10728	8.42913
78	598695	3868919	193	132	80	2.04	1.53	3.95	2.09297	8.37189	0.602079	2.40831	4.47812	17.9125	15.0983	0.384767	1.53907	18.6859	0.476194	1.90478	63.9462	1.62962	6.51847	2.11079	8.44317
79	598688	3868920	535	190	114	11.59	8.6925	22.48	2.98249	11.9299	0.870299	3.4812	6.49537	25.9815	21.8723	0.557397	2.22959	27.0682	0.689811	2.75924	91.1233	2.3222	9.28882	47.3707	189.483
80	598688	3868920	165	151	87	2.17	1.6275	4.21	2.27611	9.10443	0.702952	2.81181	5.31725	21.269	17.8259	0.45428	1.81712	22.0475	0.561862	2.24745	69.5415	1.77221	7.08884	2.08752	8.35009
81	598688	3868920	84	82	54	0.37	0.2775	0.72	1.41276	5.65102	0.360064	1.44026	2.59819	10.3928	8.8721	0.226098	0.904393	10.9672	0.279491	1.11796	43.1637	1.09999	4.39997	0.112472	0.449886
82	598688	3868920	100	74	34	0.25	0.1875	0.49	0.889513	3.55805	0.367087	1.46835	2.95782	11.8313	9.82593	0.250406	1.00162	11.984	0.305404	1.22162	27.1771	0.692587	2.77035	0.0569622	0.227849
83	598685	3868891	186	110	51	1.04	0.78	2.02	1.33427	5.33708	0.544787	2.17915	4.38002	17.5201	14.5493	0.370778	1.48311	17.7603	0.452607	1.81043	40.7657	1.03888	4.15552	0.661127	2.64451
84	598696	3868894	201	188	52	1.96	1.47	3.81	1.36043	5.44173	0.897521	3.59009	7.92569	31.7027	27.4077	0.698463	2.79385	31.104	0.792661	3.17065	41.565	1.05925	4.23701	1.37285	5.49141
85	598697	3868898	92	92	23	0.19	0.1425	0.38	0.601729	2.40692	0.423351	1.6934	3.78606	15.1442	13.2494	0.337651	1.3506	14.7951	0.377043	1.50817	18.3845	0.468515	1.87406	0.0269425	0.10777
86	598714	3868905	480	429	160	32.95	24.7125	63.92	4.18594	16.7438	2.16021	8.64084	18.196	72.7838	61.0354	1.55544	6.22175	72.5759	1.84954	7.39816	127.892	3.25923	13.0369	169.584	678.336
87	598714	3868905	262	446	110	12.85	9.6375	24.94	2.87784	11.5113	2.04089	8.16357	18.2809	73.1235	64.0766	1.63294	6.53176	71.3999	1.81957	7.27828	87.926	2.24072	8.9629	24.8179	99.2717
88	598721	3868915	250	205	94	4.82	3.615	9.35	2.45924	9.83697	1.01729	4.06914	8.20079	32.8032	27.2438	0.694286	2.77714	33.221	0.846609	3.38644	75.1368	1.9148	7.6592	7.59072	30.3629
89	598721	3868915	172	150	56	1.44	1.08	2.8	1.46508	5.86032	0.755342	3.02137	6.36123	25.4449	21.3361	0.543733	2.17493	25.3739	0.646634	2.58653	44.7623	1.14073	4.56293	0.929495	3.71798
90	598718	3868919	222	177	87	3.42	2.565	6.63	2.27611	9.10443	0.865853	3.46341	6.85927	27.4371	22.7916	0.580825	2.3233	27.9619	0.712586	2.85034	69.5415	1.77221	7.08884	4.42656	17.7062
91	598735	3868918	278	222	31	1.91	1.4325	3.71	0.811027	3.24411	0.716799	2.8672	6.74483	26.9793	24.9665	0.636251	2.545	25.9196	0.660541	2.64217	24.7791	0.631477	2.52591	1.10308	4.41233
92	598735	3868918	153	134	60	1.23	0.9225	2.39	1.56973	6.27892	0.66751	2.67004	5.41151	21.646	17.9844	0.458317	1.83327	21.8775	0.557532	2.23013	47.9596	1.22221	4.88885	0.756686	3.02675
93	598730	3868908	294	189	51	2.83	2.1225	5.5	1.33427	5.33708	0.894953	3.57981	7.92856	31.7142	27.4972	0.700745	2.80298	31.0814	0.792085	3.16834	40.7657	1.03888	4.15552	2.84362	11.3745
94	598732	3868894	431	198	158	13.48	10.11	26.16	4.13362	16.5345	0.780983	3.12393	5.17509	20.7004	18.5441	0.472583	1.89033	22.5914	0.575725	2.3029	126.294	3.21849	12.874	61.5166	246.066
95	598732	3868894	310	190	94	5.54	4.155	10.74	2.45924	9.83697	0.927982	3.71193	7.33885	29.3554	24.3881	0.621512	2.48605	29.9355	0.762882	3.05153	75.1368	1.9148	7.6592	10.8185	43.274
96	598723	3868889	219	210	70	3.22	2.415	6.25	1.83135	7.3254	1.04705	4.18818	8.99493	35.9797	30.4741	0.776609	3.10644	35.6332	0.908083	3.63233	55.9529	1.42592	5.70366	3.30801	13.232
97	598750	3868886	166	92	134	2.05	1.5375	3.97	3.50573	14.0229	0.229103	0.916414	0.880277	3.52111	4.94638	0.126054	0.504218	4.96957	0.126646	0.506582	107.11	2.72961	10.9184	3.05587	12.2235
98	598767	3868870	350	152	152	8.09	6.0675	15.69	3.97665	15.9066	0.513674	2.0547	2.96508	11.8603	11.7409	0.299207	1.19683	13.7189	0.349614	1.39846	121.498	3.09627	12.3851	28.8422	115.369
99	598767	3868870	202	100	85	1.72	1.29	3.33	2.22378	8.89513	0.378788	1.51515	2.42669	9.70676	8.89421	0.226662	0.906648	10.7407	0.273717	1.09487	67.9428	1.73147	6.92587	1.9791	7.91638
100	598767	3868870	417	212	142	12.55	9.4125	24.35	3.71503	14.8601	0.923082	3.69233	6.61688	26.4675	22.6662	0.57763	2.31052	28.0018	0.713604	2.85442	113.504	2.89257	11.5703	49.8008	199.203
101	598846	3868838	247	222	103	5.65	4.2375	10.96	2.6947	10.7788	1.09934	4.39734	8.83701	35.3481	29.3542	0.748068	2.99227	35.8349	0.913223	3.65289	82.3307	2.09813	8.39253	9.63276	38.531
102	598856	3868825	310	236	100	7.32	5.49	14.19	2.61622	10.4649	1.18358	4.73432	9.71555	38.8622	32.3427	0.824229	3.29691	39.1042	0.99654	3.98616	79.9327	2.03702	8.14809	15.2069	60.8276
103	598858	3868812	298	260	173	13.4	10.05	26	4.52605	18.1042	1.13585	4.54338	8.16327	32.6531	27.9283	0.711731	2.84692	34.5113	0.879493	3.51797	138.284	3.52405	14.0962	46.2951	185.181
104	598867	3868816	130	110	44	0.63	0.4725	1.22	1.15113	4.60454	0.553789	2.21516	4.60139	18.4056	15.3615	0.391477	1.56591	18.441	0.469953	1.87981	35.1704	0.89629	3.58516	0.241493	0.965972
105	598869	3868802	370	286	112	11.85	8.8875	22.99	2.93016	11.7206	1.44068	5.76273	12.0216	48.0866	40.1859	1.0241	4.09642	48.107	1.22597	4.90388	89.5247	2.28146	9.12586	32.9084	131.633
106	598889	3868813	224	124	43	1.19	0.8925	2.32	1.12497	4.49989	0.621295	2.48518	5.3021	21.2084	17.8952	0.456046	1.82418	21.0522	0.536499	2.146	34.3711	0.875919	3.50368	0.768124	3.0725
107	598901	3868780	432	280	114	13.79	10.3425	26.75	2.98249	11.9299	1.40848	5.63392	11.6604	46.6417	38.8895	0.991069	3.96428	46.7913	1.19244	4.76976	91.1233	2.3222	9.28882	45.5115	182.046
108	598932	3868765	534	473	220	55.57	41.6775	107.8	5.75567	23.0227	2.3412	9.36481	18.8084	75.2334	62.4754	1.59213	6.36854	76.2861	1.94409	7.77637	175.852	4.48145	17.9258	437.494	1749.98
110	598936	3868789	243	156	107	4.06	3.045	7.87	2.79935	11.1974	0.671048	2.68419	4.7646	19.0584	16.3989	0.417912	1.67165	20.2377	0.515743	2.06297	85.528	2.17961	8.71845	7.07431	28.2972
111	598932	3868789	138	117	73	1.18	0.885	2.29	1.90984	7.63935	0.526934	2.10774	3.8794	15.5176	13.1315	0.334645	1.33858	16.2502	0.414125	1.6565	58.3509	1.48703	5.9481	0.796622	3.18649
112	598932	3868790	145	146	28	0.59	0.4425	1.15	0.73254	2.93016	0.586993	2.34797	5.394	21.576	19.4421	0.495468	1.98187	20.8895	0.532353	2.12941	22.3812	0.570366	2.28146	0.160526	0.642105
113	598932	3868792	89	75	39	0.26	0.195	0.51	1.02032	4.0813	0.361443	1.44577	2.81983	11.2793	9.38569	0.239187	0.956748	11.5593	0.294581	1.17832	31.1738	0.794439	3.17775	0.0604778	0.241911
114	598931	3868792	142	79	71	0.8	0.6	1.55	1.85751	7.43005	0.288195	1.15278	1.78693	7.14774	6.70297	0.17082	0.683279	8.01757	0.204321	0.817286	56.7522	1.44629	5.78514	0.540511	2.16205
115	598952	3868773	335	260	125	10.89	8.1675	21.12	3.27027	13.0811	1.27833	5.11331	10.185	40.7401	33.8325	0.862195	3.44878	41.4334	1.0559	4.22359	99.9159	2.54628	10.1851	30.5598	122.239
125	598886	3868818	227	125	86	2.44	1.83	4.73	2.24994	8.99978	0.536841	2.14736	3.80692	15.2277	13.1111	0.334126	1.33651	16.1779	0.41228	1.64912	68.7422	1.75184	7.00736	3.19214	12.7686
126	598917	3868813	126	80	95	0.96	0.72	1.86	2.4854	9.94162	0.236555	0.946219	1.17795	4.71181	5.26554	0.134188	0.536752	5.83041	0.148583	0.594334	75.9361	1.93517	7.74068	0.770076	3.0803
127	598917	3868813	338	332	115	12.9	9.675	25.04	3.00865	12.0346	1.66327	6.65308	14.197	56.788	47.9216	1.22124	4.88497	56.3661	1.43644	5.74578	91.9226	2.34258	9.3703	33.6026	134.41
128	598919	3868819	261	270	73	5.14	3.855	9.98	1.90984	7.63935	1.27936	5.11743	11.3312	45.3248	39.289	1.00125	4.00499	44.4242	1.13212	4.52847	58.3509	1.48703	5.9481	6.56288	26.2515
129	598916	3868822	263	245	47	3.03	2.2725	5.88	1.22962	4.91848	0.985195	3.94078	9.05293	36.2117	32.6294	0.831535	3.32614	35.0599	0.893473	3.57389	37.5684	0.9574	3.8296	2.50995	10.0398
130	598921	3868821	142	110	115	1.8	1.35	3.48	3.00865	12.0346	0.359526	1.4381	2.0062	8.02482	8.16023	0.207957	0.831828	9.42241	0.240123	0.960491	91.9226	2.34258	9.3703	1.96982	7.87929
131	598921	3868821	227	139	79	2.49	1.8675	4.84	2.06681	8.26724	0.650423	2.60169	4.9414	19.7656	16.5447	0.421629	1.68651	20.4558	0.521299	2.0852	63.1469	1.60925	6.43699	2.99241	11.9696
132	598934	3868815	125	123	57	0.88	0.66	1.7	1.49124	5.96497	0.609224	2.4369	4.89866	19.5947	16.2722	0.414684	1.65873	19.8624	0.506179	2.02471	45.5617	1.1611	4.64441	0.42018	1.68072
133	598945	3868812	189	143	77	2.08	1.56	4.04	2.01449	8.05794	0.6818	2.7272	5.26592	21.0637	17.5595	0.44749	1.78996	21.6665	0.552152	2.20861	61.5482	1.56851	6.27403	2.02854	8.11417
134	598959	3868799	138	94	44	0.57	0.4275	1.11	1.15113	4.60454	0.46471	1.85884	3.72748	14.9099	12.3811	0.315523	1.26209	15.127	0.3855	1.542	35.1704	0.89629	3.58516	0.23194	0.927758
135	598956	3868808	149	76	52	0.59	0.4425	1.14	1.36043	5.44173	0.327339	1.30936	2.32652	9.30609	8.00336	0.203959	0.815837	9.8781	0.251736	1.00694	41.565	1.05925	4.23701	0.306344	1.22538
136	598964	3868805	291	237	42	2.9	2.175	5.62	1.09881	4.39524	0.906818	3.62727	8.38878	33.5551	30.4693	0.776487	3.10595	32.4164	0.826106	3.30442	33.5717	0.855549	3.4222	2.37525	9.50098
137	598968	3868802	165	102	28	0.47	0.3525	0.91	0.73254	2.93016	0.485764	1.94306	4.29389	17.1756	14.8618	0.378741	1.51496	16.8455	0.429295	1.71718	22.3812	0.570366	2.28146	0.145515	0.58206
138	598968	3868802	205	143	37	1.08	0.81	2.1	0.968	3.872	0.666975	2.6679	5.94016	23.7606	20.7036	0.527614	2.11045	23.2452	0.592385	2.36954	29.5751	0.753698	3.01479	0.548969	2.19587
139	598973	3868801	566	530	36	10.8	8.1	20.95	0.941837	3.76735	0.913426	3.65371	8.87196	35.4878	33.648	0.857492	3.42997	33.7495	0.860078	3.44031	28.7758	0.733328	2.93331	14.7472	58.989
140	598974	3868796	155	83	70	0.9	0.675	1.75	1.83135	7.3254	0.316015	1.26406	2.03339	8.13356	7.43037	0.189357	0.757428	8.98373	0.228943	0.915773	55.9529	1.42592	5.70366	0.654396	2.61758
141	598979	3868796	109	80	44	0.38	0.285	0.74	1.15113	4.60454	0.378747	1.51499	2.90679	11.6272	9.70661	0.247365	0.989461	11.9879	0.305502	1.22201	35.1704	0.89629	3.58516	0.122132	0.48853
142	598999	3868793	49	62	33	0.1	0.075	0.19	0.863351	3.4534	0.296697	1.18679	2.29933	9.19733	7.66208	0.195262	0.781048	9.44874	0.240794	0.963174	26.3778	0.672217	2.68887	0.0108362	0.0433449
143	598999	3868793	88	83	52	0.38	0.285	0.74	1.36043	5.44173	0.373116	1.49247	2.7429	10.9716	9.29009	0.23675	0.947002	11.4961	0.292968	1.17187	41.565	1.05925	4.23701	0.11653	0.46612
144	599013	3868793	192	132	57	1.44	1.08	2.8	1.49124	5.96497	0.660695	2.64278	5.40079	21.6032	17.9665	0.457862	1.83145	21.7699	0.554789	2.21916	45.5617	1.1611	4.64441	1.0561	4.22442
145	599024	3868791	248	176	82	3.58	2.685	6.94	2.1453	8.58119	0.870867	3.48347	6.99331	27.9732	23.2293	0.591981	2.36792	28.3689	0.722959	2.89184	65.5448	1.67036	6.68143	4.87884	19.5154
146	599024	3868791	178	109	41	0.8	0.6	1.54	1.07265	4.29059	0.548995	2.19598	4.61692	18.4677	15.4767	0.394412	1.57765	18.4252	0.469551	1.8782	32.7724	0.835179	3.34072	0.391257	1.56503
147	599025	3868790	260	140	81	2.95	2.2125	5.72	2.11913	8.47654	0.650698	2.60279	4.91536	19.6614	16.4854	0.420118	1.68047	20.3913	0.519657	2.07863	64.7455	1.64999	6.59995	4.1634	16.6536
148	599026	3868790	117	62	42	0.3	0.225	0.59	1.09881	4.39524	0.268416	1.07366	1.91544	7.66174	6.57587	0.167581	0.670323	8.11999	0.206932	0.827726	33.5717	0.855549	3.4222	0.0987926	0.395171
149	599026	3868790	87	47	25	0.1	0.075	0.2	0.654054	2.61622	0.22496	0.899842	1.74372	6.97488	5.8104	0.148074	0.592294	7.16504	0.182595	0.730382	19.9832	0.509255	2.03702	0.0145756	0.0583025
150	599027	3868789	191	175	68	2.27	1.7025	4.41	1.77903	7.1161	0.881625	3.5265	7.36795	29.4718	24.6421	0.627983	2.51193	29.4685	0.75098	3.00392	54.3543	1.38517	5.5407	1.97577	7.90308
151	599026	3868789	213	170	77	2.79	2.0925	5.41	2.01449	8.05794	0.845331	3.38133	6.83459	27.3384	22.709	0.57872	2.31488	27.6575	0.704829	2.81932	61.5482	1.56851	6.27403	3.0665	12.266
152	599026	3868789	237	154	80	2.92	2.19	5.66	2.09297	8.37189	0.742378	2.96951	5.79337	23.1735	19.2822	0.49139	1.96556	23.7463	0.605156	2.42063	63.9462	1.62962	6.51847	3.71013	14.8405
153	599026	3868780	196	120	51	1.2	0.9	2.33	1.33427	5.33708	0.601647	2.40659	4.93545	19.7418	16.428	0.418654	1.67462	19.8693	0.506354	2.02542	40.7657	1.03888	4.15552	0.803851	3.2154
154	599025	3868776	115	43	42	0.21	0.1575	0.4	1.09881	4.39524	0.147855	0.591421	0.868003	3.47201	3.39221	0.0864478	0.345791	3.9866	0.101595	0.406381	33.5717	0.855549	3.4222	0.0679727	0.271891
155	599026	3868788	128	105	50	0.67	0.5025	1.3	1.30811	5.23243	0.517304	2.06922	4.13161	16.5264	13.7236	0.349735	1.39894	16.793	0.427956	1.71182	39.9664	1.01851	4.07404	0.287358	1.14943
156	599025	3868788	135	98	43	0.57	0.4275	1.1	1.12497	4.49989	0.489562	1.95825	3.98748	15.9499	13.2584	0.337879	1.35152	16.0937	0.410134	1.64054	34.3711	0.875919	3.50368	0.221741	0.886962
157	599027	3868783	162	155	47	1.18	0.885	2.29	1.22962	4.91848	0.759091	3.03636	6.6178	26.4712	22.6456	0.577106	2.30842	26.0846	0.664744	2.65898	37.5684	0.9574	3.8296	0.602092	2.40837
158	599027	3868782	142	122	59	1.02	0.765	1.98	1.54357	6.17427	0.599051	2.3962	4.76572	19.0629	15.8316	0.403456	1.61383	19.3979	0.494339	1.97736	47.1603	1.20184	4.80737	0.572676	2.2907
159	599028	3868782	194	179	48	1.67	1.2525	3.23	1.25578	5.02313	0.845775	3.3831	7.49891	29.9956	26.0263	0.66326	2.65304	29.3892	0.748959	2.99584	38.3677	0.97777	3.91108	1.04214	4.16857
160	599030	3868783	105	96	70	0.71	0.5325	1.37	1.83135	7.3254	0.399476	1.5979	2.76329	11.0532	9.64595	0.245819	0.983277	11.8576	0.302182	1.20873	55.9529	1.42592	5.70366	0.349715	1.39886
161	599029	3868784	237	183	24	1.04	0.78	2.02	0.627892	2.51157	0.562651	2.2506	5.31454	21.2582	19.7494	0.503297	2.01319	20.3981	0.519829	2.07932	19.1839	0.488885	1.95554	0.396425	1.5857
162	599030	3868784	183	120	45	0.99	0.7425	1.92	1.1773	4.70919	0.604351	2.41741	5.08538	20.3415	17.051	0.434532	1.73813	20.2907	0.517092	2.06837	35.9697	0.91666	3.66664	0.546345	2.18538
163	599030	3868785	233	183	58	2.47	1.8525	4.8	1.5174	6.06962	0.904727	3.61891	7.835	31.34	26.6823	0.679977	2.71991	30.9527	0.788805	3.15522	46.361	1.18147	4.72589	2.23691	8.94765
164	599030	3868785	274	261	67	4.79	3.5925	9.3	1.75286	7.01146	1.21368	4.85473	10.8197	43.2786	37.7455	0.961915	3.84766	42.326	1.07864	4.31458	53.5549	1.3648	5.45922	5.8929	23.5716
165	599033	3868787	182	135	37	0.91	0.6825	1.76	0.968	3.872	0.64259	2.57036	5.68133	22.7253	19.6676	0.501212	2.00485	22.2871	0.567968	2.27187	29.5751	0.753698	3.01479	0.41066	1.64264
166	599033	3868787	259	181	83	3.89	2.9175	7.55	2.17146	8.68583	0.89818	3.59272	7.24053	28.9621	24.0537	0.612988	2.45195	29.3311	0.74748	2.98992	66.3442	1.69073	6.76291	5.60397	22.4159
167	599032	3868784	154	64	33	0.33	0.2475	0.63	0.863351	3.4534	0.309181	1.23673	2.41783	9.67131	8.0448	0.205015	0.820062	9.90284	0.252366	1.00946	26.3778	0.672217	2.68887	0.112387	0.449549
168	599033	3868789	312	304	56	5.31	3.9825	10.3	1.46508	5.86032	1.19232	4.76928	10.9946	43.9785	39.7876	1.01395	4.05582	42.5307	1.08386	4.33544	44.7623	1.14073	4.56293	6.21735	24.8694
169	599033	3868791	259	134	76	2.64	1.98	5.12	1.98832	7.95329	0.627509	2.51004	4.77045	19.0818	15.9694	0.406966	1.62787	19.7433	0.503142	2.01257	60.7489	1.54814	6.19255	3.48245	13.9298
170	599033	3868792	215	188	60	2.43	1.8225	4.7	1.56973	6.27892	0.930668	3.72267	8.05096	32.2038	27.3976	0.698206	2.79283	31.8176	0.810846	3.24339	47.9596	1.22221	4.88885	2.1007	8.4028
171	599019	3868777	249	155	83	3.2	2.4	6.21	2.17146	8.68583	0.740329	2.96132	5.72729	22.9092	19.0917	0.486536	1.94614	23.5506	0.600169	2.40068	66.3442	1.69073	6.76291	4.43196	17.7278
172	599019	3868777	185	154	51	1.45	1.0875	2.82	1.33427	5.33708	0.767101	3.0684	6.597	26.388	22.3647	0.569945	2.27978	26.1243	0.665757	2.66303	40.7657	1.03888	4.15552	0.916807	3.66723
173	599019	3868770	333	246	121	9.91	7.4325	19.23	3.16562	12.6625	1.20319	4.81275	9.52987	38.1195	31.6657	0.806974	3.2279	38.8512	0.990091	3.96036	96.7186	2.4648	9.85919	26.7591	107.036
174	599019	3868770	102	94	77	0.74	0.555	1.43	2.01449	8.05794	0.364703	1.45881	2.38402	9.5361	8.61924	0.219654	0.878618	10.4649	0.26669	1.06676	61.5482	1.56851	6.27403	0.389485	1.55794
175	599019	3868770	120	75	56	0.5	0.375	0.98	1.46508	5.86032	0.307887	1.23155	2.10697	8.42788	7.40092	0.188607	0.754426	9.07981	0.231392	0.925566	44.7623	1.14073	4.56293	0.225168	0.900674
176	599019	3868770	213	170	42	1.52	1.14	2.95	1.09881	4.39524	0.778474	3.1139	6.97163	27.8865	24.4315	0.622616	2.49047	27.231	0.693961	2.77584	33.5717	0.855549	3.4222	0.911256	3.64503
177	599019	3868770	194	185	74	2.66	1.995	5.15	1.936	7.744	0.931373	3.72549	7.7387	30.9548	25.8353	0.658393	2.63357	31.0143	0.790376	3.1615	59.1502	1.5074	6.02958	2.55908	10.2363
178	599009	3868764	180	152	100	2.74	2.055	5.31	2.61622	10.4649	0.667755	2.67102	4.82027	19.2811	16.457	0.419393	1.67757	20.3439	0.518448	2.07379	79.9327	2.03702	8.14809	3.30515	13.2206
179	599009	3868764	154	107	71	1.17	0.8775	2.27	1.85751	7.43005	0.468086	1.87234	3.36774	13.471	11.5158	0.293472	1.17389	14.2316	0.362682	1.45073	56.7522	1.44629	5.78514	0.857301	3.4292
180	599009	3868764	154	99	80	1.22	0.915	2.37	2.09297	8.37189	0.387429	1.54972	2.55071	10.2028	9.17856	0.233908	0.935633	11.1641	0.284509	1.13804	63.9462	1.62962	6.51847	1.00725	4.02901
181	599009	3868764	233	173	79	3.18	2.385	6.18	2.06681	8.26724	0.859095	3.43638	6.93241	27.7296	23.0313	0.586933	2.34773	28.0728	0.715414	2.86166	63.1469	1.60925	6.43699	3.92264	15.6906
182	599009	3868764	207	122	60	1.52	1.14	2.94	1.56973	6.27892	0.596722	2.38689	4.72652	18.9061	15.7051	0.400233	1.60093	19.2687	0.491048	1.96419	47.9596	1.22221	4.88885	1.26512	5.0605
183	599024	3868768	213	122	30	0.78	0.585	1.51	0.784865	3.13946	0.557572	2.23029	4.99607	19.9843	17.518	0.446431	1.78572	19.511	0.497221	1.98889	23.9798	0.611107	2.44443	0.334013	1.33605
184	599024	3868768	200	110	79	1.74	1.305	3.37	2.06681	8.26724	0.46163	1.84652	3.21467	12.8587	11.1794	0.284899	1.1396	13.7583	0.350618	1.40247	63.1469	1.60925	6.43699	1.84236	7.36944
185	599032	3868774	188	146	70	1.92	1.44	3.73	1.83135	7.3254	0.718257	2.87303	5.72668	22.9067	19.0225	0.484773	1.93909	23.2907	0.593544	2.37418	55.9529	1.42592	5.70366	1.69327	6.77307
186	599034	3868774	270	260	76	5.34	4.005	10.35	1.98832	7.95329	1.26161	5.04642	11.057	44.2279	37.9926	0.968211	3.87285	43.5038	1.10866	4.43464	60.7489	1.54814	6.19255	7.34322	29.3729
187	599034	3868775	206	116	90	2.15	1.6125	4.17	2.35459	9.41837	0.465503	1.86201	3.12813	12.5125	11.11	0.283129	1.13251	13.5787	0.346042	1.38417	71.9395	1.83332	7.33328	2.67126	10.685
188	599034	3868775	253	217	68	3.73	2.7975	7.24	1.77903	7.1161	1.07041	4.28165	9.28602	37.1441	31.6621	0.806884	3.22754	36.6632	0.934332	3.73733	54.3543	1.38517	5.5407	4.30038	17.2015
189	599055	3868762	620	383	95	22.56	16.92	43.76	2.4854	9.94162	1.75675	7.027	15.7253	62.9012	55.0822	1.40372	5.6149	61.4322	1.56555	6.2622	75.9361	1.93517	7.74068	89.0477	356.191
190	599044	3868767	408	260	96	10.18	7.635	19.76	2.51157	10.0463	1.30873	5.23492	11.0444	44.1775	37.0756	0.944842	3.77937	44.0226	1.12188	4.48753	76.7354	1.95554	7.82216	26.7207	106.883
191	599043	3868764	365	218	96	7.64	5.73	14.82	2.51157	10.0463	1.08851	4.35403	8.85857	35.4343	29.4518	0.750556	3.00222	35.7641	0.911421	3.64568	76.7354	1.95554	7.82216	17.9401	71.7605
192			304	254	84	6.49	4.8675	12.58	2.19762	8.79048	1.26495	5.05981	10.881	43.5238	36.8929	0.940186	3.76075	43.0855	1.098	4.392	67.1435	1.7111	6.84439	11.1062	44.4248
193			216	60	75	0.97	0.7275	1.89	1.96216	7.84865	0.170124	0.680496	0.8022	3.2088	3.75784	0.0957655	0.383062	4.07626	0.10388	0.415521	59.9496	1.52777	6.11107	1.05306	4.21226
194	599044	3868769	325	249	84	6.8	5.1	13.19	2.19762	8.79048	1.24355	4.97418	10.6619	42.6476	36.0793	0.919452	3.67781	42.2656	1.0771	4.30842	67.1435	1.7111	6.84439	12.4406	49.7622
195			174	108	87	1.63	1.2225	3.17	2.27611	9.10443	0.423482	1.69393	2.79259	11.1704	10.0383	0.255819	1.02328	12.2148	0.311284	1.24514	69.5415	1.77221	7.08884	1.65358	6.61431
196			100	88	90	0.79	0.5925	1.54	2.35459	9.41837	0.292442	1.16977	1.65997	6.63986	6.66052	0.169738	0.678952	7.73731	0.197179	0.788716	71.9395	1.83332	7.33328	0.476472	1.90589
197			265	82	82	1.78	1.335	3.46	2.1453	8.58119	0.277114	1.10845	1.59959	6.39834	6.33389	0.161414	0.645657	7.40096	0.188608	0.75443	65.5448	1.67036	6.68143	2.59208	10.3683
198	599046	3868773	240	202	87	4.22	3.165	8.18	2.27611	9.10443	1.01136	4.04544	8.27209	33.0883	27.5207	0.701343	2.80537	33.3369	0.849564	3.39825	69.5415	1.77221	7.08884	5.90488	23.6195
199			192	154	34	1.01	0.7575	1.95	0.889513	3.55805	0.669508	2.67803	6.07017	24.2807	21.5509	0.549208	2.19683	23.6127	0.601751	2.407	27.1771	0.692587	2.77035	0.441845	1.76738
200	599045	3868774	241	220	59	3.13	2.3475	6.07	1.54357	6.17427	1.03953	4.15814	9.21673	36.8669	31.988	0.815188	3.26075	36.1217	0.920532	3.68213	47.1603	1.20184	4.80737	2.98251	11.93
201	599040	3868773	267	200	80	4.27	3.2025	8.29	2.09297	8.37189	1.00689	4.02756	8.36616	33.4647	27.9301	0.711776	2.8471	33.529	0.85446	3.41784	63.9462	1.62962	6.51847	6.1122	24.4488
202	599043	3868774	192	140	70	1.88	1.41	3.65	1.83135	7.3254	0.681967	2.72787	5.3781	21.5124	17.8766	0.45557	1.82228	21.96	0.559632	2.23853	55.9529	1.42592	5.70366	1.69327	6.77307
203	599043	3868774	282	184	83	4.31	3.2325	8.36	2.17146	8.68583	0.915543	3.66217	7.40944	29.6377	24.6207	0.627439	2.50976	29.9733	0.763846	3.05539	66.3442	1.69073	6.76291	6.7604	27.0416
204	599043	3868774	132	79	59	0.62	0.465	1.19	1.54357	6.17427	0.324265	1.29706	2.21882	8.87527	7.79428	0.198631	0.794524	9.56221	0.243685	0.974741	47.1603	1.20184	4.80737	0.323583	1.29433
205	599040	3868775	348	363	72	9.1	6.825	17.64	1.88367	7.5347	1.48881	5.95523	13.6396	54.5585	48.9929	1.24855	4.99418	52.8753	1.34749	5.38994	57.5516	1.46666	5.86662	15.2799	61.1197
206	599040	3868779	262	203	72	3.83	2.8725	7.43	1.88367	7.5347	1.01926	4.07705	8.66427	34.6571	29.1836	0.743722	2.97489	34.4486	0.877895	3.51158	57.5516	1.46666	5.86662	4.84173	19.3669
207	599040	3868777	280	146	79	3.23	2.4225	6.27	2.06681	8.26724	0.694999	2.78	5.36012	21.4405	17.8791	0.455635	1.82254	22.0658	0.562329	2.24932	63.1469	1.60925	6.43699	4.78802	19.1521
208	599048	3868778	395	285	80	9.01	6.7575	17.47	2.09297	8.37189	1.36689	5.46756	12.0468	48.1872	41.5873	1.05982	4.23927	47.3086	1.20562	4.82249	63.9462	1.62962	6.51847	19.0801	76.3203
209	599051	3868780	449	293	70	9.21	6.9075	17.87	1.83135	7.3254	1.32248	5.28991	11.889	47.5561	41.8283	1.06596	4.26384	46.3787	1.18192	4.72769	55.9529	1.42592	5.70366	19.3987	77.5947
210	599051	3868780	212	150	70	2.23	1.6725	4.32	1.83135	7.3254	0.741989	2.96796	5.956	23.824	19.7836	0.504169	2.01668	24.1644	0.615812	2.46325	55.9529	1.42592	5.70366	2.21772	8.87088
211	599050	3868771	285	270	77	5.93	4.4475	11.49	2.01449	8.05794	1.3011	5.20439	11.4423	45.7691	39.428	1.00479	4.01916	44.9674	1.14596	4.58383	61.5482	1.56851	6.27403	8.72084	34.8834
212	599050	3868771	160	70	30	0.34	0.255	0.65	0.784865	3.13946	0.35066	1.40264	2.87125	11.485	9.55414	0.24348	0.973919	11.5668	0.29477	1.17908	23.9798	0.611107	2.44443	0.109368	0.43747
213	599057	3868771	346	326	77	8.69	6.5175	16.85	2.01449	8.05794	1.46391	5.85562	13.1772	52.709	46.4223	1.18304	4.73214	51.3821	1.30943	5.23773	61.5482	1.56851	6.27403	15.5151	62.0604
214	599052	3868786	350	249	70	6.1	4.575	11.83	1.83135	7.3254	1.19478	4.77912	10.5278	42.1112	36.3371	0.926022	3.70409	41.3462	1.05368	4.2147	55.9529	1.42592	5.70366	10.0153	40.0612
215	599068	3868779	246	207	76	3.87	2.9025	7.51	1.98832	7.95329	1.04168	4.16674	8.79995	35.1998	29.5545	0.753172	3.01269	35.0637	0.89357	3.57428	60.7489	1.54814	6.19255	4.84873	19.3949
216	599068	3868775	148	100	73	1.08	0.81	2.1	1.90984	7.63935	0.415852	1.66341	2.87511	11.5005	10.0392	0.255841	1.02336	12.3399	0.314473	1.25789	58.3509	1.48703	5.9481	0.781945	3.12778
217	599067	3868775	377	251	109	10.31	7.7325	20.01	2.85167	11.4067	1.25549	5.02198	10.2499	40.9998	34.0916	0.868797	3.47519	41.3349	1.05339	4.21354	87.1267	2.22035	8.88142	28.3919	113.568
218	599061	3868779	393	342	98	13.17	9.8775	25.55	2.56389	10.2556	1.65034	6.60135	14.5041	58.0163	49.9508	1.27296	5.09183	57.0127	1.45292	5.8117	78.3341	1.99628	7.98513	33.9917	135.967
219	599061	3868786	290	210	125	7.61	5.7075	14.77	3.27027	13.0811	0.965081	3.86032	7.2222	28.8888	24.2967	0.619183	2.47673	30.0666	0.766223	3.06489	99.9159	2.54628	10.1851	18.4868	73.947
220	599058	3868783	162	133	70	1.51	1.1325	2.93	1.83135	7.3254	0.638664	2.55466	4.96555	19.8622	16.537	0.421431	1.68573	20.3809	0.519391	2.07756	55.9529	1.42592	5.70366	1.14751	4.59006
221	599061	3868785	314	193	73	4.42	3.315	8.58	1.90984	7.63935	0.972185	3.88874	8.16726	32.669	27.3669	0.697422	2.78969	32.6059	0.830934	3.32374	58.3509	1.48703	5.9481	6.78958	27.1583
222	599056	3868782	175	122	79	1.69	1.2675	3.27	2.06681	8.26724	0.540088	2.16035	3.92233	15.6893	13.3544	0.340325	1.3613	16.5158	0.420892	1.68357	63.1469	1.60925	6.43699	1.56574	6.26297
223	599056	3868782	140	97	56	0.76	0.57	1.48	1.46508	5.86032	0.451217	1.80487	3.41087	13.6435	11.4371	0.291466	1.16586	14.1463	0.360507	1.44203	44.7623	1.14073	4.56293	0.399299	1.59719
224	599056	3868782	175	130	60	1.37	1.0275	2.65	1.56973	6.27892	0.644368	2.57747	5.18636	20.7454	17.2284	0.439052	1.75621	21.0215	0.535717	2.14287	47.9596	1.22221	4.88885	0.964002	3.85601
225	599056	3868782	218	105	70	1.6	1.2	3.11	1.83135	7.3254	0.458267	1.83307	3.29106	13.1642	11.2635	0.287041	1.14816	13.9174	0.354674	1.4187	55.9529	1.42592	5.70366	1.63622	6.54489
226	599056	3868782	242	204	60	2.96	2.22	5.75	1.56973	6.27892	0.991503	3.96601	8.68216	34.7286	29.8116	0.759725	3.0389	34.1701	0.870799	3.48319	47.9596	1.22221	4.88885	2.88023	11.5209
227	599054	3868782	140	78	40	0.44	0.33	0.85	1.04649	4.18594	0.377393	1.50957	2.95573	11.8229	9.83248	0.250573	1.00229	12.0992	0.30834	1.23336	31.9731	0.814809	3.25923	0.165123	0.660494
228	599054	3868782	106	70	79	0.59	0.4425	1.14	2.06681	8.26724	0.215594	0.862378	1.12729	4.50915	4.83607	0.123243	0.492974	5.45339	0.138975	0.555901	63.1469	1.60925	6.43699	0.331095	1.32438
229	599054	3868782	189	136	76	1.95	1.4625	3.79	1.98832	7.95329	0.640303	2.56121	4.89029	19.5612	16.35	0.416666	1.66667	20.2045	0.514896	2.05958	60.7489	1.54814	6.19255	1.87706	7.50824
230	599059	3868788	300	230	80	5.52	4.14	10.71	2.09297	8.37189	1.15276	4.61105	9.83248	39.3299	33.1766	0.845479	3.38191	39.0473	0.99509	3.98036	63.9462	1.62962	6.51847	8.87807	35.5123
231	599059	3868786	252	133	50	1.68	1.26	3.25	1.30811	5.23243	0.669865	2.67946	5.634	22.536	18.8869	0.481318	1.92527	22.4833	0.57297	2.29188	39.9664	1.01851	4.07404	1.41856	5.67424
232	599060	3868786	198	115	55	1.25	0.9375	2.43	1.43892	5.75567	0.566052	2.26421	4.516	18.064	15.0007	0.382281	1.52912	18.3626	0.467956	1.87182	43.963	1.12036	4.48145	0.912234	3.64893
233	599062	3868789	136	80	42	0.46	0.345	0.89	1.09881	4.39524	0.384449	1.53779	2.99119	11.9647	9.96045	0.253834	1.01534	12.274	0.312793	1.25117	33.5717	0.855549	3.4222	0.176082	0.704327
234	599064	3868790	231	243	62	3.48	2.61	6.75	1.62205	6.48821	1.12731	4.50925	10.0571	40.2285	35.1107	0.894768	3.57907	39.3333	1.00238	4.00951	49.5583	1.26295	5.05181	3.34004	13.3601
235	599066	3868791	306	154	83	3.91	2.9325	7.59	2.17146	8.68583	0.734026	2.9361	5.66774	22.6709	18.9005	0.481664	1.92666	23.3221	0.594345	2.37738	66.3442	1.69073	6.76291	6.65494	26.6198
236	599066	3868791	243	235	87	4.97	3.7275	9.64	2.27611	9.10443	1.18302	4.73207	9.97859	39.9143	33.4908	0.853486	3.41394	39.7812	1.01379	4.05517	69.5415	1.77221	7.08884	7.04125	28.165
237	599070	3868787	404	299	64	7.73	5.7975	15	1.67438	6.69751	1.27925	5.11701	11.6349	46.5396	41.4507	1.05634	4.22535	45.2123	1.1522	4.60879	51.157	1.30369	5.21478	13.394	53.5758
238	599063	3868783	351	326	83	9.5	7.125	18.42	2.17146	8.68583	1.5111	6.04442	13.4845	53.9381	47.088	1.2	4.8	52.7332	1.34386	5.37546	66.3442	1.69073	6.76291	18.5471	74.1886
239	599063	3868783	155	84	58	0.76	0.57	1.47	1.5174	6.06962	0.360078	1.44031	2.54967	10.1987	8.7878	0.22395	0.8958	10.8413	0.276281	1.10513	46.361	1.18147	4.72589	0.457869	1.83148
240	599068	3868774	214	207	92	4.08	3.06	7.91	2.40692	9.62767	1.03227	4.12909	8.38311	33.5324	27.8646	0.710108	2.84043	33.8702	0.863155	3.45262	73.5381	1.87406	7.49624	5.38307	21.5323
241	599070	3868785	436	317	59	8.15	6.1125	15.82	1.54357	6.17427	1.25134	5.00536	11.5288	46.1151	41.6786	1.06214	4.24858	44.6097	1.13684	4.54737	47.1603	1.20184	4.80737	14.0496	56.1984
242	599067	3868793	200	180	73	2.63	1.9725	5.1	1.90984	7.63935	0.905641	3.62257	7.50363	30.0145	25.0312	0.637899	2.5516	30.1022	0.767131	3.06853	58.3509	1.48703	5.9481	2.57322	10.2929
243	599082	3868798	206	182	78	2.92	2.19	5.67	2.04065	8.16259	0.911716	3.64687	7.46525	29.861	24.8408	0.633047	2.53219	30.0736	0.766402	3.06561	62.3475	1.58888	6.35551	3.14422	12.5769
244	599081	3868799	168	149	61	1.53	1.1475	2.96	1.59589	6.38356	0.749272	2.99709	6.19588	24.7835	20.6584	0.526463	2.10585	24.8731	0.633872	2.53549	48.759	1.24258	4.97033	1.05075	4.20299
245	599085	3868798	169	76	82	1.05	0.7875	2.04	2.1453	8.58119	0.24246	0.969839	1.31863	5.27451	5.4763	0.139559	0.558236	6.26513	0.159662	0.638648	65.5448	1.67036	6.68143	0.97512	3.90048
246	599085	3868798	115	105	62	0.75	0.5625	1.45	1.62205	6.48821	0.484118	1.93647	3.63265	14.5306	12.2097	0.311154	1.24462	15.1078	0.38501	1.54004	49.5583	1.26295	5.05181	0.35836	1.43344
247	599085	3868798	69	60	36	0.15	0.1125	0.29	0.941837	3.76735	0.274831	1.09932	2.05117	8.20468	6.90703	0.17602	0.704081	8.54785	0.217835	0.87134	28.7758	0.733328	2.93331	0.0249696	0.0998783
248	599091	3868798	250	150	75	2.81	2.1075	5.46	1.96216	7.84865	0.730679	2.92272	5.76225	23.049	19.1535	0.488111	1.95244	23.5285	0.599606	2.39842	59.9496	1.52777	6.11107	3.53082	14.1233
249	599091	3868798	148	72	46	0.49	0.3675	0.95	1.20346	4.81384	0.320771	1.28308	2.3413	9.3652	7.9538	0.202696	0.810785	9.83962	0.250755	1.00302	36.7691	0.93703	3.74812	0.223555	0.894219
250	599091	3868798	150	100	45	0.68	0.51	1.31	1.1773	4.70919	0.497764	1.99106	4.03067	16.1227	13.394	0.341336	1.36534	16.3019	0.415441	1.66176	35.9697	0.91666	3.66664	0.307596	1.23038
251	599091	3868798	212	153	88	2.85	2.1375	5.54	2.30227	9.20908	0.712733	2.85093	5.39424	21.5769	18.081	0.46078	1.84312	22.362	0.569879	2.27951	70.3408	1.79258	7.17032	3.56313	14.2525
252	599091	3868798	103	84	138	1.19	0.8925	2.32	3.61038	14.4415	0.188086	0.752343	0.574508	2.29803	3.98691	0.101603	0.406412	3.69478	0.0941584	0.376634	110.307	2.81109	11.2444	1.13353	4.5341
253	599088	3868791	243	174	57	2.41	1.8075	4.68	1.49124	5.96497	0.865263	3.46105	7.45429	29.8172	25.2987	0.644718	2.57887	29.5013	0.751818	3.00727	45.5617	1.1611	4.64441	2.237	8.94801
254	599088	3868791	107	100	30	0.32	0.24	0.62	0.784865	3.13946	0.488482	1.95393	4.26528	17.0611	14.6129	0.372397	1.48959	16.803	0.42821	1.71284	23.9798	0.611107	2.44443	0.0688372	0.275349
255	599088	3868791	102	73	95	0.71	0.5325	1.37	2.4854	9.94162	0.200157	0.800627	0.900347	3.60139	4.39474	0.111997	0.447986	4.68289	0.11934	0.477359	75.9361	1.93517	7.74068	0.461052	1.84421
256	599089	3868779	286	258	52	3.84	2.88	7.44	1.36043	5.44173	1.06796	4.27184	9.7696	39.0784	35.0329	0.892786	3.57114	37.8913	0.965628	3.86251	41.565	1.05925	4.23701	3.82709	15.3084
257	599089	3868779	234	186	71	3.09	2.3175	5.99	1.85751	7.43005	0.937041	3.74816	7.85821	31.4329	26.3139	0.670589	2.68235	31.3913	0.799982	3.19993	56.7522	1.44629	5.78514	3.44034	13.7613
258	599092	3868788	182	126	48	1.1	0.825	2.14	1.25578	5.02313	0.634757	2.53903	5.32526	21.301	17.8347	0.454502	1.81801	21.27	0.542049	2.1682	38.3677	0.97777	3.91108	0.643982	2.57593
259	599101	3868786	314	176	80	4.42	3.315	8.58	2.09297	8.37189	0.874664	3.49866	7.06582	28.2633	23.476	0.598266	2.39307	28.6018	0.728894	2.91557	63.9462	1.62962	6.51847	7.44064	29.7625
260	599103	3868790	204	90	42	0.77	0.5775	1.5	1.09881	4.39524	0.445193	1.78077	3.5736	14.2944	11.8702	0.302501	1.21001	14.4987	0.369487	1.47795	33.5717	0.855549	3.4222	0.442118	1.76847
261	599109	3868808	290	176	117	5.97	4.4775	11.59	3.06097	12.2439	0.769232	3.07693	5.53043	22.1217	18.9175	0.482098	1.92839	23.3774	0.595753	2.38301	93.5213	2.38332	9.53326	13.5746	54.2983
262	599108	3868802	163	104	60	1.02	0.765	1.97	1.56973	6.27892	0.483907	1.93563	3.65879	14.6352	12.2676	0.31263	1.25052	15.1732	0.386678	1.54671	47.9596	1.22221	4.88885	0.668509	2.67404
263	599113	3868805	232	100	82	1.9	1.425	3.69	2.1453	8.58119	0.387725	1.5509	2.53312	10.1325	9.16164	0.233477	0.933908	11.1219	0.283433	1.13373	65.5448	1.67036	6.68143	2.42228	9.6891
264	599113	3868805	100	56	22	0.12	0.09	0.24	0.575567	2.30227	0.282076	1.1283	2.35226	9.40905	7.86153	0.200345	0.801379	9.41514	0.239937	0.95975	17.5852	0.448145	1.79258	0.0176918	0.0707672
265	599117	3868806	155	113	43	0.75	0.5625	1.46	1.12497	4.49989	0.569259	2.27704	4.77678	19.1071	15.999	0.407722	1.63089	19.0779	0.486184	1.94474	34.3711	0.875919	3.50368	0.334988	1.33995
266	599121	3868816	270	164	46	2.04	1.53	3.95	1.20346	4.81384	0.786378	3.14551	6.93128	27.7251	23.9299	0.609834	2.43934	27.2187	0.693646	2.77458	36.7691	0.93703	3.74812	1.69793	6.79172
267	599120	3868822	142	120	32	0.55	0.4125	1.06	0.837189	3.34876	0.565897	2.26359	5.02099	20.084	17.4377	0.444386	1.77754	19.6732	0.501355	2.00542	25.5785	0.651847	2.60739	0.167482	0.66993
268	599120	3868822	220	170	53	1.98	1.485	3.85	1.38659	5.54638	0.837688	3.35075	7.27277	29.0911	24.8113	0.632297	2.52919	28.7068	0.73157	2.92628	42.3644	1.07962	4.31849	1.54715	6.18859
269	599122	3868824	157	122	63	1.21	0.9075	2.34	1.64822	6.59286	0.589128	2.35651	4.60512	18.4205	15.3235	0.390506	1.56202	18.8643	0.480742	1.92297	50.3576	1.28332	5.1333	0.802036	3.20814
270	599129	3868836	192	158	52	1.58	1.185	3.06	1.36043	5.44173	0.786277	3.14511	6.76875	27.075	22.9612	0.585149	2.3406	26.7951	0.682852	2.73141	41.565	1.05925	4.23701	1.05713	4.22853
271	599129	3868836	194	144	92	2.57	1.9275	4.99	2.40692	9.62767	0.641542	2.56617	4.6826	18.7304	15.9076	0.405393	1.62157	19.6792	0.50151	2.00604	73.5381	1.87406	7.49624	3.07391	12.2956
272	599130	3868852	212	130	63	1.74	1.305	3.37	1.64822	6.59286	0.638034	2.55214	5.07313	20.2925	16.8532	0.429491	1.71796	20.6531	0.526328	2.10531	50.3576	1.28332	5.1333	1.55738	6.22951
	Area 1
	Area 2
	Area 3
	Radio Carbon Samples
